# Supplementary material for: Upper gastrointestinal bleeding: incidence, etiology and outcomes in a population-based setting
Source: PubMed Central journal article supplement — Scand J Gastroenterol. 2013 Jan 29;48(4):439–47. doi: 10.3109/00365521.2012.763174 (PMC3613943; doi:10.3109/00365521.2012.763174), 2013-01-29
Supplement: GAS-48-439-s001.pdf [file GAS-48-439-s001.pdf]

**Supplementary material available online**

**Supplementary data:**

|                                                 | <i>n = 156 (%)</i> |
|-------------------------------------------------|--------------------|
| <b>Gender</b>                                   |                    |
| Female                                          | 66 (42)            |
| Male                                            | 90 (58)            |
| Median age (interquartile range)                | 70.5 (55.8-80.3)   |
| <b>History of past GIB bleeding</b>             |                    |
| Yes                                             | 23 (14.7)          |
| No                                              | 99 (63.5)          |
| Unclear                                         | 34 (21.8)          |
| <b>Laboratory data</b>                          |                    |
| Hemoglobin (g/L) - <i>n = 156</i>               | 90.5 (79-104.3)    |
| Under normal values                             | 141 (90.4)         |
| Normal values                                   | 15 (9.6)           |
| Hematocrit (L/L) - <i>n = 156</i>               | 0.27 (0.24-0.32)   |
| Under normal values                             | 138 (88.5)         |
| Normal values                                   | 18 (11.5)          |
| Platelets x 10 <sup>9</sup> /L - <i>n = 156</i> | 218 (163.5-302.3)  |
| Under normal values                             | 27 (17.3)          |
| Normal values                                   | 114 (73.1)         |
| Over normal values                              | 15 (9.6)           |
| Creatinine μmol/L - <i>n = 156</i>              | 75 (53-99.5)       |

|                                 |                 |
|---------------------------------|-----------------|
| Normal values                   | 111 (71.2)      |
| Over normal values              | 45 (28.8)       |
| INR - $n = 23^1$                | 1.7 (1.1-3.2)   |
| Normal values                   | 8 (34.8)        |
| Over normal values              | 15 (65.2)       |
| PT (sec.) <sup>2</sup> $n = 56$ | 15.1 $\pm$ 2.16 |
| Under normal values             | 2 (3.6)         |
| Normal values                   | 28 (50)         |
| Over normal values              | 19 (33.9)       |

---

<sup>1</sup>30 people were on warfarin but 7 INR values were missing

Supplementary table 1. Baseline characteristics. Values are presented as median and interquartile range or as a count of individuals. INR, international normalized ratio; PT, prothrombin time.

| <i>Cause of bleeding</i> | <i>n = 37 (%)</i> |
|--------------------------|-------------------|
| Gastric Ulcer            | 10 (27)           |
| Duodenal Ulcer           | 10 (27)           |
| Esophagal Varices        | 6 (16.3)          |
| Vascular ectasia         | 5 (13.5)          |
| Mallory-Weiss tear       | 1 (2.7)           |
| Dieulafoy's Lesion       | 1 (2.7)           |
| Anastomotic Ulcer        | 1 (2.7)           |
| Gastric & Duodenal Ulcer | 1 (2.7)           |

|                               |                               |
|-------------------------------|-------------------------------|
| Unknown Abnormality in Mucosa | 1 (2.7)                       |
| Bleeding after Papillotomy    | 1 (2.7)                       |
| <hr/>                         |                               |
| <i>Endoscopic measure</i>     | <i>n = 60<sup>1</sup> (%)</i> |
| Epinephrine injection         | 20 (33.4)                     |
| Thermal devices               | 17 (28.3)                     |
| Hemoclips                     | 17 (28.3)                     |
| Band Ligation                 | 6 (10)                        |

<sup>1</sup>21 patients underwent more than one endoscopic measure

Supplementary table 2. Endoscopic hemostasis.
